# Supplementary material
Source: Springer Nature journal article supplement (https://www.springermedizin.de/resource/supplementary/12936_2011_1971_MOESM2_ESM.pdf/9542708)

**Fig. 2a Responses regarding Millenium Development Goals**

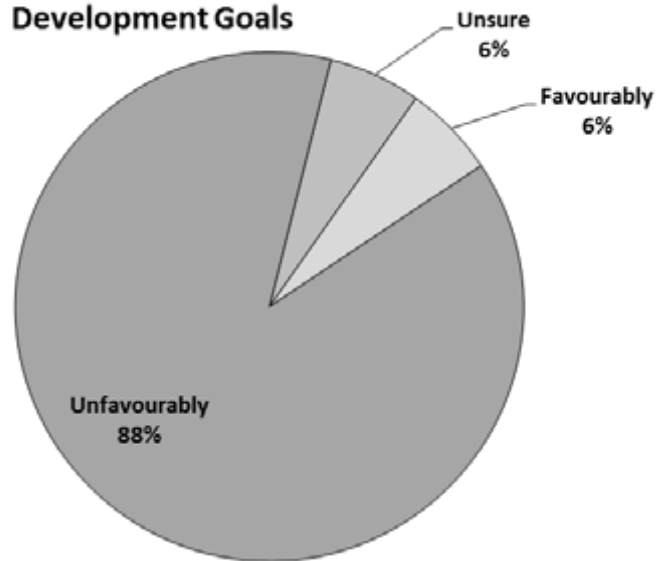

**Fig. 2b Responses regarding potential danger of vector control methods**

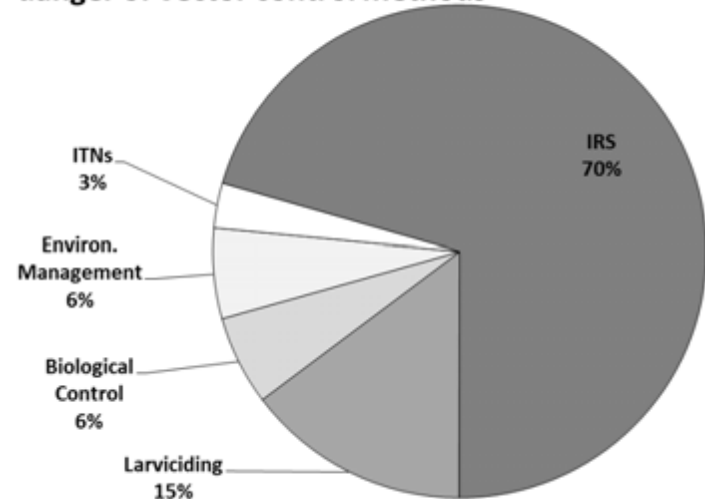

**Fig. 2c Responses regarding inter-sectoral collaboration**

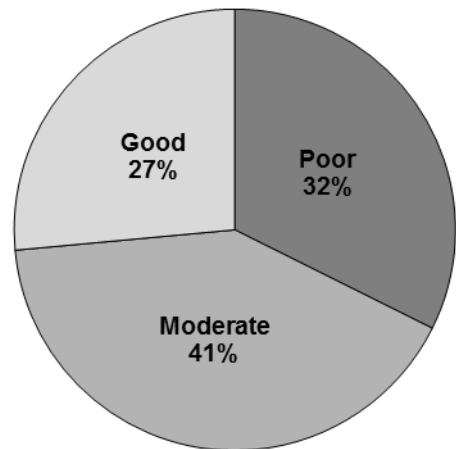

**Fig. 2d Responses regarding research to policy**

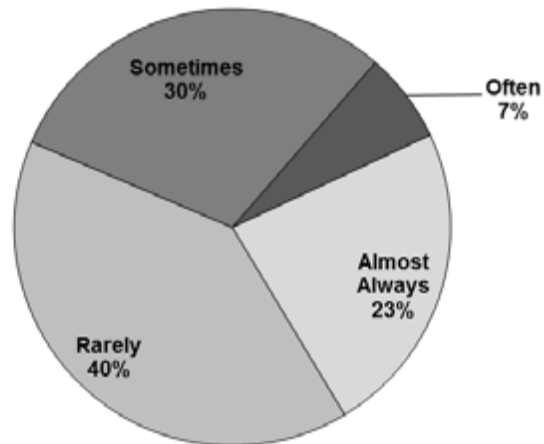

**Fig. 2e Responses regarding capacity**

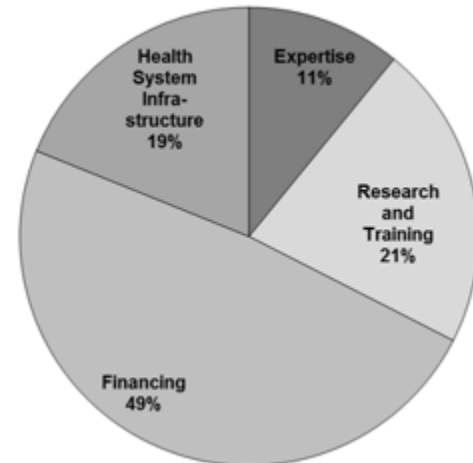

Supplement: MOESM2 [file 9542708]
